# Supplementary material for: Predicting Drosha and Dicer Cleavage Sites with DeepMirCut
Source: Front Mol Biosci. 2022 Jan 24;8:799056. doi: 10.3389/fmolb.2021.799056 (PMC8819831; doi:10.3389/fmolb.2021.799056)
Supplement: Supplementary file 5 [file Table1.XLSX]

## Sheet: suppTable1_datasetDownloadInfo
species	MiRBase Version	Genome Id	Genome Download Location	Assembly info file location	miRBase Gff Location
aae	22.1	GCA_000004015.1	ftp://ftp.ncbi.nlm.nih.gov/genomes/all/GCA/000/004/015/GCA_000004015.1_Aedes_aegypti/GCA_000004015.1_Aedes_aegypti_genomic.fna.gz	ftp://ftp.ncbi.nlm.nih.gov/genomes/all/GCA/000/004/015/GCA_000004015.1_Aedes_aegypti/GCA_000004015.1_Aedes_aegypti_assembly_report.txt	ftp://mirbase.org/pub/mirbase/22.1/genomes/aae.gff3
abu	22.1	GCA_000239415.1	ftp://ftp.ncbi.nlm.nih.gov/genomes/all/GCA/000/239/415/GCA_000239415.1_AstBur1.0/GCA_000239415.1_AstBur1.0_genomic.fna.gz	ftp://ftp.ncbi.nlm.nih.gov/genomes/all/GCA/000/239/415/GCA_000239415.1_AstBur1.0/GCA_000239415.1_AstBur1.0_assembly_report.txt	ftp://mirbase.org/pub/mirbase/22.1/genomes/abu.gff3
aca	22.1	GCA_000090745.2	ftp://ftp.ncbi.nlm.nih.gov/genomes/all/GCA/000/090/745/GCA_000090745.2_AnoCar2.0/GCA_000090745.2_AnoCar2.0_genomic.fna.gz	ftp://ftp.ncbi.nlm.nih.gov/genomes/all/GCA/000/090/745/GCA_000090745.2_AnoCar2.0/GCA_000090745.2_AnoCar2.0_assembly_report.txt	ftp://mirbase.org/pub/mirbase/22.1/genomes/aca.gff3
aga	22.1	GCA_000005575.1	ftp://ftp.ncbi.nlm.nih.gov/genomes/all/GCA/000/005/575/GCA_000005575.1_AgamP3/GCA_000005575.1_AgamP3_genomic.fna.gz	ftp://ftp.ncbi.nlm.nih.gov/genomes/all/GCA/000/005/575/GCA_000005575.1_AgamP3/GCA_000005575.1_AgamP3_assembly_report.txt	ftp://mirbase.org/pub/mirbase/22.1/genomes/aga.gff3
aly	22.1	GCA_000004255.1	ftp://ftp.ncbi.nlm.nih.gov/genomes/all/GCA/000/004/255/GCA_000004255.1_v.1.0/GCA_000004255.1_v.1.0_genomic.fna.gz	ftp://ftp.ncbi.nlm.nih.gov/genomes/all/GCA/000/004/255/GCA_000004255.1_v.1.0/GCA_000004255.1_v.1.0_assembly_report.txt	ftp://mirbase.org/pub/mirbase/22.1/genomes/aly.gff3
ame	22.1	GCA_000002195.1	ftp://ftp.ncbi.nlm.nih.gov/genomes/all/GCA/000/002/195/GCA_000002195.1_Amel_4.5/GCA_000002195.1_Amel_4.5_genomic.fna.gz	ftp://ftp.ncbi.nlm.nih.gov/genomes/all/GCA/000/002/195/GCA_000002195.1_Amel_4.5/GCA_000002195.1_Amel_4.5_assembly_report.txt	ftp://mirbase.org/pub/mirbase/22.1/genomes/ame.gff3
ami	22.1	GCA_000281125.4	ftp://ftp.ncbi.nlm.nih.gov/genomes/all/GCA/000/281/125/GCA_000281125.4_ASM28112v4/GCA_000281125.4_ASM28112v4_genomic.fna.gz	ftp://ftp.ncbi.nlm.nih.gov/genomes/all/GCA/000/281/125/GCA_000281125.4_ASM28112v4/GCA_000281125.4_ASM28112v4_assembly_report.txt	ftp://mirbase.org/pub/mirbase/22.1/genomes/ami.gff3
aof	22.1	GCA_001876935.1	ftp://ftp.ncbi.nlm.nih.gov/genomes/all/GCA/001/876/935/GCA_001876935.1_Aspof.V1/GCA_001876935.1_Aspof.V1_genomic.fna.gz	ftp://ftp.ncbi.nlm.nih.gov/genomes/all/GCA/001/876/935/GCA_001876935.1_Aspof.V1/GCA_001876935.1_Aspof.V1_assembly_report.txt	ftp://mirbase.org/pub/mirbase/22.1/genomes/aof.gff3
api	22.1	GCA_000142985.2	ftp://ftp.ncbi.nlm.nih.gov/genomes/all/GCA/000/142/985/GCA_000142985.2_Acyr_2.0/GCA_000142985.2_Acyr_2.0_genomic.fna.gz	ftp://ftp.ncbi.nlm.nih.gov/genomes/all/GCA/000/142/985/GCA_000142985.2_Acyr_2.0/GCA_000142985.2_Acyr_2.0_assembly_report.txt	ftp://mirbase.org/pub/mirbase/22.1/genomes/api.gff3
apl	22.1	GCA_000355885.1	ftp://ftp.ncbi.nlm.nih.gov/genomes/all/GCA/000/355/885/GCA_000355885.1_BGI_duck_1.0/GCA_000355885.1_BGI_duck_1.0_genomic.fna.gz	ftp://ftp.ncbi.nlm.nih.gov/genomes/all/GCA/000/355/885/GCA_000355885.1_BGI_duck_1.0/GCA_000355885.1_BGI_duck_1.0_assembly_report.txt	ftp://mirbase.org/pub/mirbase/22.1/genomes/apl.gff3
ata	22.1	GCA_000347335.2	ftp://ftp.ncbi.nlm.nih.gov/genomes/all/GCA/000/347/335/GCA_000347335.2_ASM34733v2/GCA_000347335.2_ASM34733v2_genomic.fna.gz	ftp://ftp.ncbi.nlm.nih.gov/genomes/all/GCA/000/347/335/GCA_000347335.2_ASM34733v2/GCA_000347335.2_ASM34733v2_assembly_report.txt	ftp://mirbase.org/pub/mirbase/22.1/genomes/ata.gff3
ath	22.1	GCA_000001735.1	ftp://ftp.ncbi.nlm.nih.gov/genomes/all/GCA/000/001/735/GCA_000001735.1_TAIR10/GCA_000001735.1_TAIR10_genomic.fna.gz	ftp://ftp.ncbi.nlm.nih.gov/genomes/all/GCA/000/001/735/GCA_000001735.1_TAIR10/GCA_000001735.1_TAIR10_assembly_report.txt	ftp://mirbase.org/pub/mirbase/22.1/genomes/ath.gff3
atr	22.1	GCA_000471905	ftp://ftp.ncbi.nlm.nih.gov/genomes/all/GCA/000/471/905/GCA_000471905.1_AMTR1.0/GCA_000471905.1_AMTR1.0_genomic.fna.gz	ftp://ftp.ncbi.nlm.nih.gov/genomes/all/GCA/000/471/905/GCA_000471905.1_AMTR1.0/GCA_000471905.1_AMTR1.0_assembly_report.txt	ftp://mirbase.org/pub/mirbase/22.1/genomes/atr.gff3
bdi	22.1	GCA_000005505.1	ftp://ftp.ncbi.nlm.nih.gov/genomes/all/GCA/000/005/505/GCA_000005505.1_v1.0/GCA_000005505.1_v1.0_genomic.fna.gz	ftp://ftp.ncbi.nlm.nih.gov/genomes/all/GCA/000/005/505/GCA_000005505.1_v1.0/GCA_000005505.1_v1.0_assembly_report.txt	ftp://mirbase.org/pub/mirbase/22.1/genomes/bdi.gff3
bdo	22.1	GCA_000789215.2	ftp://ftp.ncbi.nlm.nih.gov/genomes/all/GCA/000/789/215/GCA_000789215.2_ASM78921v2/GCA_000789215.2_ASM78921v2_genomic.fna.gz	ftp://ftp.ncbi.nlm.nih.gov/genomes/all/GCA/000/789/215/GCA_000789215.2_ASM78921v2/GCA_000789215.2_ASM78921v2_assembly_report.txt	ftp://mirbase.org/pub/mirbase/22.1/genomes/bdo.gff3
bfl	22.1	GCF_000003815.1	ftp://ftp.ncbi.nlm.nih.gov/genomes/all/GCA/000/003/815/GCA_000003815.1_Version_2/GCA_000003815.1_Version_2_genomic.fna.gz	ftp://ftp.ncbi.nlm.nih.gov/genomes/all/GCA/000/003/815/GCA_000003815.1_Version_2/GCA_000003815.1_Version_2_assembly_report.txt	ftp://mirbase.org/pub/mirbase/22.1/genomes/bfl.gff3
blv	22.1	K02120.1	https://www.ncbi.nlm.nih.gov/sviewer/viewer.cgi?tool=portal&save=file&log$=seqview&db=nuccore&report=fasta&id=210767&extrafeat=null&conwithfeat=on&showgi=1		ftp://mirbase.org/pub/mirbase/22.1/genomes/blv.gff3
bma	22.1	GCA_000002995.4	ftp://ftp.ncbi.nlm.nih.gov/genomes/all/GCA/000/002/995/GCA_000002995.4_B_malayi-3.0/GCA_000002995.4_B_malayi-3.0_genomic.fna.gz	ftp://ftp.ncbi.nlm.nih.gov/genomes/all/GCA/000/002/995/GCA_000002995.4_B_malayi-3.0/GCA_000002995.4_B_malayi-3.0_assembly_report.txt	ftp://mirbase.org/pub/mirbase/22.1/genomes/bma.gff3
bmo	22.1	GCA_000151625.1	ftp://ftp.ncbi.nlm.nih.gov/genomes/all/GCA/000/151/625/GCA_000151625.1_ASM15162v1/GCA_000151625.1_ASM15162v1_genomic.fna.gz	ftp://ftp.ncbi.nlm.nih.gov/genomes/all/GCA/000/151/625/GCA_000151625.1_ASM15162v1/GCA_000151625.1_ASM15162v1_assembly_report.txt	ftp://mirbase.org/pub/mirbase/22.1/genomes/bmo.gff3
bra	22.1	GCA_000309985.1	ftp://ftp.ncbi.nlm.nih.gov/genomes/all/GCA/000/309/985/GCA_000309985.1_Brapa_1.0/GCA_000309985.1_Brapa_1.0_genomic.fna.gz	ftp://ftp.ncbi.nlm.nih.gov/genomes/all/GCA/000/309/985/GCA_000309985.1_Brapa_1.0/GCA_000309985.1_Brapa_1.0_assembly_report.txt	ftp://mirbase.org/pub/mirbase/22.1/genomes/bra.gff3
bta	22.1	GCA_000003205.6	ftp://ftp.ncbi.nlm.nih.gov/genomes/all/GCA/000/003/205/GCA_000003205.6_Btau_5.0.1/GCA_000003205.6_Btau_5.0.1_genomic.fna.gz	ftp://ftp.ncbi.nlm.nih.gov/genomes/all/GCA/000/003/205/GCA_000003205.6_Btau_5.0.1/GCA_000003205.6_Btau_5.0.1_assembly_report.txt	ftp://mirbase.org/pub/mirbase/22.1/genomes/bta.gff3
cas	22.1	GCA_000633955.1	ftp://ftp.ncbi.nlm.nih.gov/genomes/all/GCA/000/633/955/GCA_000633955.1_Cs/GCA_000633955.1_Cs_genomic.fna.gz	ftp://ftp.ncbi.nlm.nih.gov/genomes/all/GCA/000/633/955/GCA_000633955.1_Cs/GCA_000633955.1_Cs_assembly_report.txt	ftp://mirbase.org/pub/mirbase/22.1/genomes/cas.gff3
cbn	22.1	GCA_000143925.2	ftp://ftp.ncbi.nlm.nih.gov/genomes/all/GCA/000/143/925/GCA_000143925.2_C_brenneri-6.0.1b/GCA_000143925.2_C_brenneri-6.0.1b_genomic.fna.gz	ftp://ftp.ncbi.nlm.nih.gov/genomes/all/GCA/000/143/925/GCA_000143925.2_C_brenneri-6.0.1b/GCA_000143925.2_C_brenneri-6.0.1b_assembly_report.txt	ftp://mirbase.org/pub/mirbase/22.1/genomes/cbn.gff3
cbr	22.1	GCA_000004555.3	ftp://ftp.ncbi.nlm.nih.gov/genomes/all/GCA/000/004/555/GCA_000004555.3_CB4/GCA_000004555.3_CB4_genomic.fna.gz	ftp://ftp.ncbi.nlm.nih.gov/genomes/all/GCA/000/004/555/GCA_000004555.3_CB4/GCA_000004555.3_CB4_assembly_report.txt	ftp://mirbase.org/pub/mirbase/22.1/genomes/cbr.gff3
cel	22.1	GCA_000002985.3	ftp://ftp.ncbi.nlm.nih.gov/genomes/all/GCA/000/002/985/GCA_000002985.3_WBcel235/GCA_000002985.3_WBcel235_genomic.fna.gz	ftp://ftp.ncbi.nlm.nih.gov/genomes/all/GCA/000/002/985/GCA_000002985.3_WBcel235/GCA_000002985.3_WBcel235_assembly_report.txt	ftp://mirbase.org/pub/mirbase/22.1/genomes/cel.gff3
cfa	22.1	GCA_000002285.2	ftp://ftp.ncbi.nlm.nih.gov/genomes/all/GCA/000/002/285/GCA_000002285.2_CanFam3.1/GCA_000002285.2_CanFam3.1_genomic.fna.gz	ftp://ftp.ncbi.nlm.nih.gov/genomes/all/GCA/000/002/285/GCA_000002285.2_CanFam3.1/GCA_000002285.2_CanFam3.1_assembly_report.txt	ftp://mirbase.org/pub/mirbase/22.1/genomes/cfa.gff3
cgr	22.1	GCA_000223135.1	ftp://ftp.ncbi.nlm.nih.gov/genomes/all/GCA/000/223/135/GCA_000223135.1_CriGri_1.0/GCA_000223135.1_CriGri_1.0_genomic.fna.gz	ftp://ftp.ncbi.nlm.nih.gov/genomes/all/GCA/000/223/135/GCA_000223135.1_CriGri_1.0/GCA_000223135.1_CriGri_1.0_assembly_report.txt	ftp://mirbase.org/pub/mirbase/22.1/genomes/cgr.gff3
chi	22.1	GCA_000317765.2	ftp://ftp.ncbi.nlm.nih.gov/genomes/all/GCA/000/317/765/GCA_000317765.2_CHIR_2.0/GCA_000317765.2_CHIR_2.0_genomic.fna.gz	ftp://ftp.ncbi.nlm.nih.gov/genomes/all/GCA/000/317/765/GCA_000317765.2_CHIR_2.0/GCA_000317765.2_CHIR_2.0_assembly_report.txt	ftp://mirbase.org/pub/mirbase/22.1/genomes/chi.gff3
cin	22.1	v2.0	ftp://ftp.jgi-psf.org/pub/JGI_data/Ciona/v2.0/ciona050324.unmasked.fasta.gz	./genomes/ciona050324.unmasked.fasta.fai	ftp://mirbase.org/pub/mirbase/22.1/genomes/cin.gff3
cja	22.1	GCA_000004665.1	ftp://ftp.ncbi.nlm.nih.gov/genomes/all/GCA/000/004/665/GCA_000004665.1_Callithrix_jacchus-3.2/GCA_000004665.1_Callithrix_jacchus-3.2_genomic.fna.gz	ftp://ftp.ncbi.nlm.nih.gov/genomes/all/GCA/000/004/665/GCA_000004665.1_Callithrix_jacchus-3.2/GCA_000004665.1_Callithrix_jacchus-3.2_assembly_report.txt	ftp://mirbase.org/pub/mirbase/22.1/genomes/cja.gff3
cli	22.1	GCA_000337935.1	ftp://ftp.ncbi.nlm.nih.gov/genomes/all/GCA/000/337/935/GCA_000337935.1_Cliv_1.0/GCA_000337935.1_Cliv_1.0_genomic.fna.gz	ftp://ftp.ncbi.nlm.nih.gov/genomes/all/GCA/000/337/935/GCA_000337935.1_Cliv_1.0/GCA_000337935.1_Cliv_1.0_assembly_report.txt	ftp://mirbase.org/pub/mirbase/22.1/genomes/cli.gff3
cpi	22.1	GCA_000241765.2	ftp://ftp.ncbi.nlm.nih.gov/genomes/all/GCA/000/241/765/GCA_000241765.2_Chrysemys_picta_bellii-3.0.3/GCA_000241765.2_Chrysemys_picta_bellii-3.0.3_genomic.fna.gz	ftp://ftp.ncbi.nlm.nih.gov/genomes/all/GCA/000/241/765/GCA_000241765.2_Chrysemys_picta_bellii-3.0.3/GCA_000241765.2_Chrysemys_picta_bellii-3.0.3_assembly_report.txt	ftp://mirbase.org/pub/mirbase/22.1/genomes/cpi.gff3
cpo	22.1	GCA_000151735.1	ftp://ftp.ncbi.nlm.nih.gov/genomes/all/GCA/000/151/735/GCA_000151735.1_Cavpor3.0/GCA_000151735.1_Cavpor3.0_genomic.fna.gz	ftp://ftp.ncbi.nlm.nih.gov/genomes/all/GCA/000/151/735/GCA_000151735.1_Cavpor3.0/GCA_000151735.1_Cavpor3.0_assembly_report.txt	ftp://mirbase.org/pub/mirbase/22.1/genomes/cpo.gff3
cqu	22.1	GCA_000209185.1	ftp://ftp.ncbi.nlm.nih.gov/genomes/all/GCA/000/209/185/GCA_000209185.1_CulPip1.0/GCA_000209185.1_CulPip1.0_genomic.fna.gz	ftp://ftp.ncbi.nlm.nih.gov/genomes/all/GCA/000/209/185/GCA_000209185.1_CulPip1.0/GCA_000209185.1_CulPip1.0_assembly_report.txt	ftp://mirbase.org/pub/mirbase/22.1/genomes/cqu.gff3
cre	22.1	GCA_000002595.2	ftp://ftp.ncbi.nlm.nih.gov/genomes/all/GCA/000/002/595/GCA_000002595.2_v3.0/GCA_000002595.2_v3.0_genomic.fna.gz	ftp://ftp.ncbi.nlm.nih.gov/genomes/all/GCA/000/002/595/GCA_000002595.2_v3.0/GCA_000002595.2_v3.0_assembly_report.txt	ftp://mirbase.org/pub/mirbase/22.1/genomes/cre.gff3
crm	22.1	WS200	ftp://ftp.wormbase.org/pub/wormbase/releases/WS200/species/c_remanei/c_remanei.WS200.genomic.fa.gz		ftp://mirbase.org/pub/mirbase/22.1/genomes/crm.gff3
csa	22.1	CSAV2.0	ftp://ftp.ensembl.org/pub/release-95/fasta/ciona_savignyi/dna/Ciona_savignyi.CSAV2.0.dna.toplevel.fa.gz		ftp://mirbase.org/pub/mirbase/22.1/genomes/csa.gff3
csi	22.1	GCA_000317415.1	ftp://ftp.ncbi.nlm.nih.gov/genomes/all/GCA/000/317/415/GCA_000317415.1_Csi_valencia_1.0/GCA_000317415.1_Csi_valencia_1.0_genomic.fna.gz	ftp://ftp.ncbi.nlm.nih.gov/genomes/all/GCA/000/317/415/GCA_000317415.1_Csi_valencia_1.0/GCA_000317415.1_Csi_valencia_1.0_assembly_report.txt	ftp://mirbase.org/pub/mirbase/22.1/genomes/csi.gff3
cst	22.1	GCA_000004075.2	ftp://ftp.ncbi.nlm.nih.gov/genomes/all/GCA/000/004/075/GCA_000004075.2_ASM407v2/GCA_000004075.2_ASM407v2_genomic.fna.gz	ftp://ftp.ncbi.nlm.nih.gov/genomes/all/GCA/000/004/075/GCA_000004075.2_ASM407v2/GCA_000004075.2_ASM407v2_assembly_report.txt	ftp://mirbase.org/pub/mirbase/22.1/genomes/cst.gff3
cte	22.1	GCA_000328365.1	ftp://ftp.ncbi.nlm.nih.gov/genomes/all/GCA/000/328/365/GCA_000328365.1_Capca1/GCA_000328365.1_Capca1_genomic.fna.gz	ftp://ftp.ncbi.nlm.nih.gov/genomes/all/GCA/000/328/365/GCA_000328365.1_Capca1/GCA_000328365.1_Capca1_assembly_report.txt	ftp://mirbase.org/pub/mirbase/22.1/genomes/cte.gff3
dan	22.1	GCA_000005115.1	ftp://ftp.ncbi.nlm.nih.gov/genomes/all/GCA/000/005/115/GCA_000005115.1_dana_caf1/GCA_000005115.1_dana_caf1_genomic.fna.gz	ftp://ftp.ncbi.nlm.nih.gov/genomes/all/GCA/000/005/115/GCA_000005115.1_dana_caf1/GCA_000005115.1_dana_caf1_assembly_report.txt	ftp://mirbase.org/pub/mirbase/22.1/genomes/dan.gff3
ddi	22.1	GCA_000004695.1	ftp://ftp.ncbi.nlm.nih.gov/genomes/all/GCA/000/004/695/GCA_000004695.1_dicty_2.7/GCA_000004695.1_dicty_2.7_genomic.fna.gz		ftp://mirbase.org/pub/mirbase/22.1/genomes/ddi.gff3
der	22.1	dere_r1.3_FB2010_02	ftp://ftp.flybase.net/genomes/Drosophila_erecta/dere_r1.3_FB2010_02/fasta/dere-all-chromosome-r1.3.fasta.gz		ftp://mirbase.org/pub/mirbase/22.1/genomes/der.gff3
dgr	22.1	dgri_r1.3_FB2010_02	ftp://ftp.flybase.net/genomes/Drosophila_grimshawi/dgri_r1.3_FB2010_02/fasta/dgri-all-chromosome-r1.3.fasta.gz		ftp://mirbase.org/pub/mirbase/22.1/genomes/dgr.gff3
dma	22.1	GCA_000241425.1	ftp://ftp.ncbi.nlm.nih.gov/genomes/all/GCA/000/241/425/GCA_000241425.1_DauMad_1.0/GCA_000241425.1_DauMad_1.0_genomic.fna.gz	ftp://ftp.ncbi.nlm.nih.gov/genomes/all/GCA/000/241/425/GCA_000241425.1_DauMad_1.0/GCA_000241425.1_DauMad_1.0_assembly_report.txt	ftp://mirbase.org/pub/mirbase/22.1/genomes/dma.gff3
dme	22.1	GCA_000001215.4	ftp://ftp.ncbi.nlm.nih.gov/genomes/all/GCA/000/001/215/GCA_000001215.4_Release_6_plus_ISO1_MT/GCA_000001215.4_Release_6_plus_ISO1_MT_genomic.fna.gz	ftp://ftp.ncbi.nlm.nih.gov/genomes/all/GCA/000/001/215/GCA_000001215.4_Release_6_plus_ISO1_MT/GCA_000001215.4_Release_6_plus_ISO1_MT_assembly_report.txt	ftp://mirbase.org/pub/mirbase/22.1/genomes/dme.gff3
dmo	22.1	dmoj_r1.3_FB2010_02	ftp://ftp.flybase.net/genomes/Drosophila_mojavensis/dmoj_r1.3_FB2010_02/fasta/dmoj-all-chromosome-r1.3.fasta.gz		ftp://mirbase.org/pub/mirbase/22.1/genomes/dmo.gff3
dno	22.1	Dasypus novemcinctus	ftp://ftp.ncbi.nlm.nih.gov/genomes/all/GCA/000/208/655/GCA_000208655.2_Dasnov3.0/GCA_000208655.2_Dasnov3.0_genomic.fna.gz	ftp://ftp.ncbi.nlm.nih.gov/genomes/all/GCA/000/208/655/GCA_000208655.2_Dasnov3.0/GCA_000208655.2_Dasnov3.0_assembly_report.txt	ftp://mirbase.org/pub/mirbase/22.1/genomes/dno.gff3
dpe	22.1	dper_r1.3_FB2010_02	ftp://ftp.flybase.net/genomes/Drosophila_persimilis/dper_r1.3_FB2010_02/fasta/dper-all-chromosome-r1.3.fasta.gz		ftp://mirbase.org/pub/mirbase/22.1/genomes/dpe.gff3
dps	22.1	dpse_r2.26_FB2012_01	ftp://ftp.flybase.net/genomes/Drosophila_pseudoobscura/dpse_r2.26_FB2012_01/fasta/dpse-all-chromosome-r2.26.fasta.gz		ftp://mirbase.org/pub/mirbase/22.1/genomes/dps.gff3
dpu	22.1	GCA_000187875.1	ftp://ftp.ncbi.nlm.nih.gov/genomes/all/GCA/000/187/875/GCA_000187875.1_V1.0/GCA_000187875.1_V1.0_genomic.fna.gz	ftp://ftp.ncbi.nlm.nih.gov/genomes/all/GCA/000/187/875/GCA_000187875.1_V1.0/GCA_000187875.1_V1.0_assembly_report.txt	ftp://mirbase.org/pub/mirbase/22.1/genomes/dpu.gff3
dre	22.1	GCA_000002035.4	ftp://ftp.ncbi.nlm.nih.gov/genomes/all/GCA/000/002/035/GCA_000002035.4_GRCz11/GCA_000002035.4_GRCz11_genomic.fna.gz	ftp://ftp.ncbi.nlm.nih.gov/genomes/all/GCA/000/002/035/GCA_000002035.4_GRCz11/GCA_000002035.4_GRCz11_assembly_report.txt	ftp://mirbase.org/pub/mirbase/22.1/genomes/dre.gff3
dse	22.1	dsec_r1.3_FB2010_02	ftp://ftp.flybase.net/genomes/Drosophila_sechellia/dsec_r1.3_FB2010_02/fasta/dsec-all-chromosome-r1.3.fasta.gz		ftp://mirbase.org/pub/mirbase/22.1/genomes/dse.gff3
dsi	22.1	GCA_000259055.1	ftp://ftp.ncbi.nlm.nih.gov/genomes/all/GCA/000/259/055/GCA_000259055.1_dsim_caf1/GCA_000259055.1_dsim_caf1_genomic.fna.gz	ftp://ftp.ncbi.nlm.nih.gov/genomes/all/GCA/000/259/055/GCA_000259055.1_dsim_caf1/GCA_000259055.1_dsim_caf1_assembly_report.txt	ftp://mirbase.org/pub/mirbase/22.1/genomes/dsi.gff3
dvi	22.1	GCA_000005245.1	ftp://ftp.ncbi.nlm.nih.gov/genomes/all/GCA/000/005/245/GCA_000005245.1_dvir_caf1/GCA_000005245.1_dvir_caf1_genomic.fna.gz	ftp://ftp.ncbi.nlm.nih.gov/genomes/all/GCA/000/005/245/GCA_000005245.1_dvir_caf1/GCA_000005245.1_dvir_caf1_assembly_report.txt	ftp://mirbase.org/pub/mirbase/22.1/genomes/dvi.gff3
dwi	22.1	dwil_r1.3_FB2010_02	ftp://ftp.flybase.net/genomes/Drosophila_willistoni/dwil_r1.3_FB2010_02/fasta/dwil-all-chromosome-r1.3.fasta.gz		ftp://mirbase.org/pub/mirbase/22.1/genomes/dwi.gff3
dya	22.1	GCA_000005975.1	ftp://ftp.ncbi.nlm.nih.gov/genomes/all/GCA/000/005/975/GCA_000005975.1_dyak_caf1/GCA_000005975.1_dyak_caf1_genomic.fna.gz	ftp://ftp.ncbi.nlm.nih.gov/genomes/all/GCA/000/005/975/GCA_000005975.1_dyak_caf1/GCA_000005975.1_dyak_caf1_assembly_report.txt	ftp://mirbase.org/pub/mirbase/22.1/genomes/dya.gff3
ebv	22.1	GCA_002402265.1	ftp://ftp.ncbi.nlm.nih.gov/genomes/all/GCA/002/402/265/GCA_002402265.1_ASM240226v1/GCA_002402265.1_ASM240226v1_genomic.fna.gz	ftp://ftp.ncbi.nlm.nih.gov/genomes/all/GCA/002/402/265/GCA_002402265.1_ASM240226v1/GCA_002402265.1_ASM240226v1_assembly_report.txt	ftp://mirbase.org/pub/mirbase/22.1/genomes/ebv.gff3
eca	22.1	GCF_000002305.2	ftp://ftp.ncbi.nlm.nih.gov/genomes/all/GCA/000/002/305/GCA_000002305.1_EquCab2.0/GCA_000002305.1_EquCab2.0_genomic.fna.gz	ftp://ftp.ncbi.nlm.nih.gov/genomes/all/GCA/000/002/305/GCA_000002305.1_EquCab2.0/GCA_000002305.1_EquCab2.0_assembly_report.txt	ftp://mirbase.org/pub/mirbase/22.1/genomes/eca.gff3
eel	22.1	GCA_003665695.1	ftp://ftp.ncbi.nlm.nih.gov/genomes/all/GCA/003/665/695/GCA_003665695.1_Eelec_Soap_1.0/GCA_003665695.1_Eelec_Soap_1.0_genomic.fna.gz	ftp://ftp.ncbi.nlm.nih.gov/genomes/all/GCA/003/665/695/GCA_003665695.1_Eelec_Soap_1.0/GCA_003665695.1_Eelec_Soap_1.0_assembly_report.txt	ftp://mirbase.org/pub/mirbase/22.1/genomes/eel.gff3
efu	22.1	GCA_000308155.1	ftp://ftp.ncbi.nlm.nih.gov/genomes/all/GCA/000/308/155/GCA_000308155.1_EptFus1.0/GCA_000308155.1_EptFus1.0_genomic.fna.gz	ftp://ftp.ncbi.nlm.nih.gov/genomes/all/GCA/000/308/155/GCA_000308155.1_EptFus1.0/GCA_000308155.1_EptFus1.0_assembly_report.txt	ftp://mirbase.org/pub/mirbase/22.1/genomes/efu.gff3
egr	22.1	GCA_000524195.1	ftp://ftp.ncbi.nlm.nih.gov/genomes/all/GCA/000/524/195/GCA_000524195.1_ASM52419v1/GCA_000524195.1_ASM52419v1_genomic.fna.gz	ftp://ftp.ncbi.nlm.nih.gov/genomes/all/GCA/000/524/195/GCA_000524195.1_ASM52419v1/GCA_000524195.1_ASM52419v1_assembly_report.txt	ftp://mirbase.org/pub/mirbase/22.1/genomes/egr.gff3
emu	22.1	WTSI3	ftp://ftp.sanger.ac.uk/pub/project/pathogens/Echinococcus/multilocularis/genome/Emultilocularis_genome_v3.fas		ftp://mirbase.org/pub/mirbase/22.1/genomes/emu.gff3
esi	22.1	EctsiV2	https://bioinformatics.psb.ugent.be/gdb/ectocarpus/Ectsi_genome_V2_cleaned.tfa.gz		ftp://mirbase.org/pub/mirbase/22.1/genomes/esi.gff3
fhe	22.1	GCA_000947175.1	ftp://ftp.ncbi.nlm.nih.gov/genomes/all/GCA/000/947/175/GCA_000947175.1_Fhepatica_v1/GCA_000947175.1_Fhepatica_v1_genomic.fna.gz	ftp://ftp.ncbi.nlm.nih.gov/genomes/all/GCA/000/947/175/GCA_000947175.1_Fhepatica_v1/GCA_000947175.1_Fhepatica_v1_assembly_report.txt	ftp://mirbase.org/pub/mirbase/22.1/genomes/fhe.gff3
fru	22.1	GCA_000180615.2	ftp://ftp.ncbi.nlm.nih.gov/genomes/all/GCA/000/180/615/GCA_000180615.2_FUGU5/GCA_000180615.2_FUGU5_genomic.fna.gz	ftp://ftp.ncbi.nlm.nih.gov/genomes/all/GCA/000/180/615/GCA_000180615.2_FUGU5/GCA_000180615.2_FUGU5_assembly_report.txt	ftp://mirbase.org/pub/mirbase/22.1/genomes/fru.gff3
fve	22.1	v1.1	ftp://ftp.bioinfo.wsu.edu/species/Fragaria_vesca/Fvesca-genome.v1.1/assembly/*		ftp://mirbase.org/pub/mirbase/22.1/genomes/fve.gff3
gga	22.1	GCA_000002315.3	ftp://ftp.ncbi.nlm.nih.gov/genomes/all/GCA/000/002/315/GCA_000002315.3_Gallus_gallus-5.0/GCA_000002315.3_Gallus_gallus-5.0_genomic.fna.gz	ftp://ftp.ncbi.nlm.nih.gov/genomes/all/GCA/000/002/315/GCA_000002315.3_Gallus_gallus-5.0/GCA_000002315.3_Gallus_gallus-5.0_assembly_report.txt	ftp://mirbase.org/pub/mirbase/22.1/genomes/gga.gff3
ggo	22.1	GCA_000151905.3	ftp://ftp.ncbi.nlm.nih.gov/genomes/all/GCA/000/151/905/GCA_000151905.3_gorGor4/GCA_000151905.3_gorGor4_genomic.fna.gz	ftp://ftp.ncbi.nlm.nih.gov/genomes/all/GCA/000/151/905/GCA_000151905.3_gorGor4/GCA_000151905.3_gorGor4_assembly_report.txt	ftp://mirbase.org/pub/mirbase/22.1/genomes/ggo.gff3
gma	22.1	GCA_000004515.3	ftp://ftp.ncbi.nlm.nih.gov/genomes/all/GCF/000/004/515/GCF_000004515.4_Glycine_max_v2.0/GCF_000004515.4_Glycine_max_v2.0_genomic.fna.gz	ftp://ftp.ncbi.nlm.nih.gov/genomes/all/GCF/000/004/515/GCF_000004515.4_Glycine_max_v2.0/GCF_000004515.4_Glycine_max_v2.0_assembly_report.txt	ftp://mirbase.org/pub/mirbase/22.1/genomes/gma.gff3
gmo	22.1	GCA_000231765.1	ftp://ftp.ncbi.nlm.nih.gov/genomes/all/GCA/000/231/765/GCA_000231765.1_GadMor_May2010/GCA_000231765.1_GadMor_May2010_genomic.fna.gz	ftp://ftp.ncbi.nlm.nih.gov/genomes/all/GCA/000/231/765/GCA_000231765.1_GadMor_May2010/GCA_000231765.1_GadMor_May2010_assembly_report.txt	ftp://mirbase.org/pub/mirbase/22.1/genomes/gmo.gff3
gra	22.1	GCA_000327365.1	ftp://ftp.ncbi.nlm.nih.gov/genomes/all/GCA/000/327/365/GCA_000327365.1_Graimondii2_0/GCA_000327365.1_Graimondii2_0_genomic.fna.gz	ftp://ftp.ncbi.nlm.nih.gov/genomes/all/GCA/000/327/365/GCA_000327365.1_Graimondii2_0/GCA_000327365.1_Graimondii2_0_assembly_report.txt	ftp://mirbase.org/pub/mirbase/22.1/genomes/gra.gff3
hbr	22.1	GCA_000340545.1	ftp://ftp.ncbi.nlm.nih.gov/genomes/all/GCA/000/340/545/GCA_000340545.1_Hevbra_1.0/GCA_000340545.1_Hevbra_1.0_genomic.fna.gz	ftp://ftp.ncbi.nlm.nih.gov/genomes/all/GCA/000/340/545/GCA_000340545.1_Hevbra_1.0/GCA_000340545.1_Hevbra_1.0_assembly_report.txt	ftp://mirbase.org/pub/mirbase/22.1/genomes/hbr.gff3
hbv	22.1	GCA_000844145.1	ftp://ftp.ncbi.nlm.nih.gov/genomes/all/GCA/000/844/145/GCA_000844145.1_ViralProj14489/GCA_000844145.1_ViralProj14489_genomic.fna.gz	ftp://ftp.ncbi.nlm.nih.gov/genomes/all/GCA/000/844/145/GCA_000844145.1_ViralProj14489/GCA_000844145.1_ViralProj14489_assembly_report.txt	ftp://mirbase.org/pub/mirbase/22.1/genomes/hbv.gff3
hcmv	22.1	X17403.1	https://www.ncbi.nlm.nih.gov/sviewer/viewer.cgi?tool=portal&save=file&log60seqview&db=nuccore&report=fasta&id=59591&extrafeat=null&conwithfeat=on		ftp://mirbase.org/pub/mirbase/22.1/genomes/hcmv.gff3
hme	22.1	GCA_000313835.2	ftp://ftp.ncbi.nlm.nih.gov/genomes/all/GCA/000/313/835/GCA_000313835.2_ASM31383v2/GCA_000313835.2_ASM31383v2_genomic.fna.gz	ftp://ftp.ncbi.nlm.nih.gov/genomes/all/GCA/000/313/835/GCA_000313835.2_ASM31383v2/GCA_000313835.2_ASM31383v2_assembly_report.txt	ftp://mirbase.org/pub/mirbase/22.1/genomes/hme.gff3
hpo	22.1	nHp_1_0	http://www.nematodes.org/genomes/heligmosomoides_polygyrus/nHp_1_0.fna.gz		ftp://mirbase.org/pub/mirbase/22.1/genomes/hpo.gff3
hsa	22.1	Heligmosomoides polygyrus	ftp://ftp.ncbi.nlm.nih.gov/genomes/all/GCA/000/001/405/GCA_000001405.15_GRCh38/GCA_000001405.15_GRCh38_genomic.fna.gz	ftp://ftp.ncbi.nlm.nih.gov/genomes/all/GCA/000/001/405/GCA_000001405.15_GRCh38/GCA_000001405.15_GRCh38_assembly_report.txt	ftp://mirbase.org/pub/mirbase/22.1/genomes/hsa.gff3
hvu	22.1	GCA_000227425.1	ftp://ftp.ncbi.nlm.nih.gov/genomes/all/GCA/000/227/425/GCA_000227425.1_Hvul_cvHarunaNijo3HBAC01/GCA_000227425.1_Hvul_cvHarunaNijo3HBAC01_genomic.fna.gz	ftp://ftp.ncbi.nlm.nih.gov/genomes/all/GCA/000/227/425/GCA_000227425.1_Hvul_cvHarunaNijo3HBAC01/GCA_000227425.1_Hvul_cvHarunaNijo3HBAC01_assembly_report.txt	ftp://mirbase.org/pub/mirbase/22.1/genomes/hvu.gff3
isc	22.1	GCA_000208615.1	ftp://ftp.ncbi.nlm.nih.gov/genomes/all/GCA/000/208/615/GCA_000208615.1_JCVI_ISG_i3_1.0/GCA_000208615.1_JCVI_ISG_i3_1.0_genomic.fna.gz	ftp://ftp.ncbi.nlm.nih.gov/genomes/all/GCA/000/208/615/GCA_000208615.1_JCVI_ISG_i3_1.0/GCA_000208615.1_JCVI_ISG_i3_1.0_assembly_report.txt	ftp://mirbase.org/pub/mirbase/22.1/genomes/isc.gff3
kshv	22.1	U75698.1	https://www.ncbi.nlm.nih.gov/sviewer/viewer.cgi?tool=portal&save=file&log60seqview&db=nuccore&report=fasta&id=2065526&extrafeat=null&conwithfeat=on		ftp://mirbase.org/pub/mirbase/22.1/genomes/kshv.gff3
lgi	22.1	GCA_000327385.1	ftp://ftp.ncbi.nlm.nih.gov/genomes/all/GCA/000/327/385/GCA_000327385.1_Helro1/GCA_000327385.1_Helro1_genomic.fna.gz	ftp://ftp.ncbi.nlm.nih.gov/genomes/all/GCA/000/327/385/GCA_000327385.1_Helro1/GCA_000327385.1_Helro1_assembly_report.txt	ftp://mirbase.org/pub/mirbase/22.1/genomes/lgi.gff3
lja	22.1	lj2.5	ftp://ftp.kazusa.or.jp/pub/lotus/lotus_r2.5/pseudomolecule/Lj2.5_pseudomol.fna.gz		ftp://mirbase.org/pub/mirbase/22.1/genomes/lja.gff3
mco	22.1	GCA_000951315.1	ftp://ftp.ncbi.nlm.nih.gov/genomes/all/GCA/000/951/315/GCA_000951315.1_M_corti_Specht_Voge/GCA_000951315.1_M_corti_Specht_Voge_genomic.fna.gz	ftp://ftp.ncbi.nlm.nih.gov/genomes/all/GCA/000/951/315/GCA_000951315.1_M_corti_Specht_Voge/GCA_000951315.1_M_corti_Specht_Voge_assembly_report.txt	ftp://mirbase.org/pub/mirbase/22.1/genomes/mco.gff3
mdm	22.1	v1.0	https://www.rosaceae.org/sites/default/files/apple_genome/Malus_x_domestica.v1.0.contigs.fa.gz		ftp://mirbase.org/pub/mirbase/22.1/genomes/mdm.gff3
mdo	22.1	GCF_000002295.2	ftp://ftp.ncbi.nlm.nih.gov/genomes/all/GCF/000/002/295/GCF_000002295.2_MonDom5/GCF_000002295.2_MonDom5_genomic.fna.gz	ftp://ftp.ncbi.nlm.nih.gov/genomes/all/GCF/000/002/295/GCF_000002295.2_MonDom5/GCF_000002295.2_MonDom5_assembly_report.txt	ftp://mirbase.org/pub/mirbase/22.1/genomes/mdo.gff3
mdv1	22.1	GCA_000846265.1	ftp://ftp.ncbi.nlm.nih.gov/genomes/all/GCA/000/846/265/GCA_000846265.1_ViralProj14402/GCA_000846265.1_ViralProj14402_genomic.fna.gz	ftp://ftp.ncbi.nlm.nih.gov/genomes/all/GCA/000/846/265/GCA_000846265.1_ViralProj14402/GCA_000846265.1_ViralProj14402_assembly_report.txt	ftp://mirbase.org/pub/mirbase/22.1/genomes/mdv1.gff3
mes	22.1	Cassava4	ftp://ftp.psb.ugent.be/pub/plaza/plaza_public_dicots_03//Genomes/mes.con.gz		ftp://mirbase.org/pub/mirbase/22.1/genomes/mes.gff3
mghv	22.1	U97553.1	https://www.ncbi.nlm.nih.gov/sviewer/viewer.cgi?tool=portal&save=file&log60seqview&db=nuccore&report=fasta&id=2317923&conwithfeat=on&withparts=on		ftp://mirbase.org/pub/mirbase/22.1/genomes/mghv.gff3
mml	22.1	GCA_000772875.3	ftp://ftp.ncbi.nlm.nih.gov/genomes/all/GCA/000/772/875/GCA_000772875.3_Mmul_8.0.1/GCA_000772875.3_Mmul_8.0.1_genomic.fna.gz	ftp://ftp.ncbi.nlm.nih.gov/genomes/all/GCA/000/772/875/GCA_000772875.3_Mmul_8.0.1/GCA_000772875.3_Mmul_8.0.1_assembly_report.txt	ftp://mirbase.org/pub/mirbase/22.1/genomes/mml.gff3
mmr	22.1	GCA_000165445.3	ftp://ftp.ncbi.nlm.nih.gov/genomes/all/GCA/000/165/445/GCA_000165445.3_Mmur_3.0/GCA_000165445.3_Mmur_3.0_genomic.fna.gz	ftp://ftp.ncbi.nlm.nih.gov/genomes/all/GCA/000/165/445/GCA_000165445.3_Mmur_3.0/GCA_000165445.3_Mmur_3.0_assembly_report.txt	ftp://mirbase.org/pub/mirbase/22.1/genomes/mmr.gff3
mmu	22.1	GCA_000001635.8	ftp://ftp.ncbi.nlm.nih.gov/genomes/all/GCA/000/001/635/GCA_000001635.8_GRCm38.p6/GCA_000001635.8_GRCm38.p6_genomic.fna.gz	ftp://ftp.ncbi.nlm.nih.gov/genomes/all/GCA/000/001/635/GCA_000001635.8_GRCm38.p6/GCA_000001635.8_GRCm38.p6_assembly_report.txt	ftp://mirbase.org/pub/mirbase/22.1/genomes/mmu.gff3
mse	22.1	GCA_000262585.1	ftp://ftp.ncbi.nlm.nih.gov/genomes/all/GCA/000/262/585/GCA_000262585.1_Msex_1.0/GCA_000262585.1_Msex_1.0_genomic.fna.gz	ftp://ftp.ncbi.nlm.nih.gov/genomes/all/GCA/000/262/585/GCA_000262585.1_Msex_1.0/GCA_000262585.1_Msex_1.0_assembly_report.txt	ftp://mirbase.org/pub/mirbase/22.1/genomes/mse.gff3
mtr	22.1	JCVI_Mt3.5.2	https://de.cyverse.org/dl/d/7324CC86-BAF4-4989-8E70-5B54BE8FB523/MedtrA17_3.5.assemblies.fasta		ftp://mirbase.org/pub/mirbase/22.1/genomes/mtr.gff3
mze	22.1	GCA_000238955.3	ftp://ftp.ncbi.nlm.nih.gov/genomes/all/GCA/000/238/955/GCA_000238955.3_M_zebra_UMD1/GCA_000238955.3_M_zebra_UMD1_genomic.fna.gz	ftp://ftp.ncbi.nlm.nih.gov/genomes/all/GCA/000/238/955/GCA_000238955.3_M_zebra_UMD1/GCA_000238955.3_M_zebra_UMD1_assembly_report.txt	ftp://mirbase.org/pub/mirbase/22.1/genomes/mze.gff3
nbr	22.1	GCA_000239395.1	ftp://ftp.ncbi.nlm.nih.gov/genomes/all/GCA/000/239/395/GCA_000239395.1_NeoBri1.0/GCA_000239395.1_NeoBri1.0_genomic.fna.gz	ftp://ftp.ncbi.nlm.nih.gov/genomes/all/GCA/000/239/395/GCA_000239395.1_NeoBri1.0/GCA_000239395.1_NeoBri1.0_assembly_report.txt	ftp://mirbase.org/pub/mirbase/22.1/genomes/nbr.gff3
nle	22.1	GCA_000146795.3	ftp://ftp.ncbi.nlm.nih.gov/genomes/all/GCA/000/146/795/GCA_000146795.3_Nleu_3.0/GCA_000146795.3_Nleu_3.0_genomic.fna.gz	ftp://ftp.ncbi.nlm.nih.gov/genomes/all/GCA/000/146/795/GCA_000146795.3_Nleu_3.0/GCA_000146795.3_Nleu_3.0_assembly_report.txt	ftp://mirbase.org/pub/mirbase/22.1/genomes/nle.gff3
nve	22.1	GCA_000209225.1	ftp://ftp.ncbi.nlm.nih.gov/genomes/all/GCA/000/209/225/GCA_000209225.1_ASM20922v1/GCA_000209225.1_ASM20922v1_genomic.fna.gz	ftp://ftp.ncbi.nlm.nih.gov/genomes/all/GCA/000/209/225/GCA_000209225.1_ASM20922v1/GCA_000209225.1_ASM20922v1_assembly_report.txt	ftp://mirbase.org/pub/mirbase/22.1/genomes/nve.gff3
nvi	22.1	GCA_000002325.2	ftp://ftp.ncbi.nlm.nih.gov/genomes/all/GCA/000/002/325/GCA_000002325.2_Nvit_2.1/GCA_000002325.2_Nvit_2.1_genomic.fna.gz	ftp://ftp.ncbi.nlm.nih.gov/genomes/all/GCA/000/002/325/GCA_000002325.2_Nvit_2.1/GCA_000002325.2_Nvit_2.1_assembly_report.txt	ftp://mirbase.org/pub/mirbase/22.1/genomes/nvi.gff3
oan	22.1	OANA5	ftp://ftp.ensembl.org/pub/release-95/fasta/ornithorhynchus_anatinus/dna/Ornithorhynchus_anatinus.OANA5.dna_sm.toplevel.fa.gz		ftp://mirbase.org/pub/mirbase/22.1/genomes/oan.gff3
oar	22.1	GCA_000298735.2	ftp://ftp.ncbi.nlm.nih.gov/genomes/all/GCA/000/298/735/GCA_000298735.2_Oar_v4.0/GCA_000298735.2_Oar_v4.0_genomic.fna.gz	ftp://ftp.ncbi.nlm.nih.gov/genomes/all/GCA/000/298/735/GCA_000298735.2_Oar_v4.0/GCA_000298735.2_Oar_v4.0_assembly_report.txt	ftp://mirbase.org/pub/mirbase/22.1/genomes/oar.gff3
ocu	22.1	GCA_000003625.1	ftp://ftp.ncbi.nlm.nih.gov/genomes/all/GCA/000/003/625/GCA_000003625.1_OryCun2.0/GCA_000003625.1_OryCun2.0_genomic.fna.gz	ftp://ftp.ncbi.nlm.nih.gov/genomes/all/GCA/000/003/625/GCA_000003625.1_OryCun2.0/GCA_000003625.1_OryCun2.0_assembly_report.txt	ftp://mirbase.org/pub/mirbase/22.1/genomes/ocu.gff3
oga	22.1	GCA_000181295.3	ftp://ftp.ncbi.nlm.nih.gov/genomes/all/GCA/000/181/295/GCA_000181295.3_OtoGar3/GCA_000181295.3_OtoGar3_genomic.fna.gz	ftp://ftp.ncbi.nlm.nih.gov/genomes/all/GCA/000/181/295/GCA_000181295.3_OtoGar3/GCA_000181295.3_OtoGar3_assembly_report.txt	ftp://mirbase.org/pub/mirbase/22.1/genomes/oga.gff3
oha	22.1	GCA_000516915.1	ftp://ftp.ncbi.nlm.nih.gov/genomes/all/GCA/000/516/915/GCA_000516915.1_OphHan1.0/GCA_000516915.1_OphHan1.0_genomic.fna.gz	ftp://ftp.ncbi.nlm.nih.gov/genomes/all/GCA/000/516/915/GCA_000516915.1_OphHan1.0/GCA_000516915.1_OphHan1.0_assembly_report.txt	ftp://mirbase.org/pub/mirbase/22.1/genomes/oha.gff3
ola	22.1	MEDAKA1	ftp://hgdownload.cse.ucsc.edu/goldenPath/oryLat2/bigZips/oryLat2.fa.gz		ftp://mirbase.org/pub/mirbase/22.1/genomes/ola.gff3
oni	22.1	GCA_000188235.2	ftp://ftp.ncbi.nlm.nih.gov/genomes/all/GCA/000/188/235/GCA_000188235.2_Orenil1.1/GCA_000188235.2_Orenil1.1_genomic.fna.gz	ftp://ftp.ncbi.nlm.nih.gov/genomes/all/GCA/000/188/235/GCA_000188235.2_Orenil1.1/GCA_000188235.2_Orenil1.1_assembly_report.txt	ftp://mirbase.org/pub/mirbase/22.1/genomes/oni.gff3
osa	22.1	MSU7	http://rice.plantbiology.msu.edu/pub/data/Eukaryotic_Projects/o_sativa/annotation_dbs/pseudomolecules/version_7.0/all.dir/all.con		ftp://mirbase.org/pub/mirbase/22.1/genomes/osa.gff3
pab	22.1	v1.0	ftp://plantgenie.org/Data/ConGenIE/Picea_abies/v1.0/FASTA/GenomeAssemblies/Pabies1.0-genome.fa.gz		ftp://mirbase.org/pub/mirbase/22.1/genomes/pab.gff3
pal	22.1	GCA_000325575.1	ftp://ftp.ncbi.nlm.nih.gov/genomes/all/GCA/000/325/575/GCA_000325575.1_ASM32557v1/GCA_000325575.1_ASM32557v1_genomic.fna.gz	ftp://ftp.ncbi.nlm.nih.gov/genomes/all/GCA/000/325/575/GCA_000325575.1_ASM32557v1/GCA_000325575.1_ASM32557v1_assembly_report.txt	ftp://mirbase.org/pub/mirbase/22.1/genomes/pal.gff3
pbv	22.1	GCA_000186305.2	ftp://ftp.ncbi.nlm.nih.gov/genomes/all/GCA/000/186/305/GCA_000186305.2_Python_molurus_bivittatus-5.0.2/GCA_000186305.2_Python_molurus_bivittatus-5.0.2_genomic.fna.gz	ftp://ftp.ncbi.nlm.nih.gov/genomes/all/GCA/000/186/305/GCA_000186305.2_Python_molurus_bivittatus-5.0.2/GCA_000186305.2_Python_molurus_bivittatus-5.0.2_assembly_report.txt	ftp://mirbase.org/pub/mirbase/22.1/genomes/pbv.gff3
pma	22.1	GCA_000148955.1	ftp://ftp.ncbi.nlm.nih.gov/genomes/all/GCA/000/148/955/GCA_000148955.1_Petromyzon_marinus-7.0/GCA_000148955.1_Petromyzon_marinus-7.0_genomic.fna.gz	ftp://ftp.ncbi.nlm.nih.gov/genomes/all/GCA/000/148/955/GCA_000148955.1_Petromyzon_marinus-7.0/GCA_000148955.1_Petromyzon_marinus-7.0_assembly_report.txt	ftp://mirbase.org/pub/mirbase/22.1/genomes/pma.gff3
pny	22.1	GCA_000239375.1	ftp://ftp.ncbi.nlm.nih.gov/genomes/all/GCA/000/239/375/GCA_000239375.1_PunNye1.0/GCA_000239375.1_PunNye1.0_genomic.fna.gz	ftp://ftp.ncbi.nlm.nih.gov/genomes/all/GCA/000/239/375/GCA_000239375.1_PunNye1.0/GCA_000239375.1_PunNye1.0_assembly_report.txt	ftp://mirbase.org/pub/mirbase/22.1/genomes/pny.gff3
ppa	22.1	GCA_000258655.2	ftp://ftp.ncbi.nlm.nih.gov/genomes/all/GCA/000/258/655/GCA_000258655.2_panpan1.1/GCA_000258655.2_panpan1.1_genomic.fna.gz	ftp://ftp.ncbi.nlm.nih.gov/genomes/all/GCA/000/258/655/GCA_000258655.2_panpan1.1/GCA_000258655.2_panpan1.1_assembly_report.txt	ftp://mirbase.org/pub/mirbase/22.1/genomes/ppa.gff3
ppc	22.1	GCA_000180635.3	ftp://ftp.ncbi.nlm.nih.gov/genomes/all/GCA/000/180/635/GCA_000180635.3_El_Paco/GCA_000180635.3_El_Paco_genomic.fna.gz	ftp://ftp.ncbi.nlm.nih.gov/genomes/all/GCA/000/180/635/GCA_000180635.3_El_Paco/GCA_000180635.3_El_Paco_assembly_report.txt	ftp://mirbase.org/pub/mirbase/22.1/genomes/ppc.gff3
ppe	22.1	GCA_000346465.2	ftp://ftp.ncbi.nlm.nih.gov/genomes/all/GCA/000/346/465/GCA_000346465.2_Prunus_persica_NCBIv2/GCA_000346465.2_Prunus_persica_NCBIv2_genomic.fna.gz	ftp://ftp.ncbi.nlm.nih.gov/genomes/all/GCA/000/346/465/GCA_000346465.2_Prunus_persica_NCBIv2/GCA_000346465.2_Prunus_persica_NCBIv2_assembly_report.txt	ftp://mirbase.org/pub/mirbase/22.1/genomes/ppe.gff3
ppt	22.1	GCA_000002425.2	ftp://ftp.ncbi.nlm.nih.gov/genomes/all/GCA/000/002/425/GCA_000002425.2_Phypa_V3/GCA_000002425.2_Phypa_V3_genomic.fna.gz	ftp://ftp.ncbi.nlm.nih.gov/genomes/all/GCA/000/002/425/GCA_000002425.2_Phypa_V3/GCA_000002425.2_Phypa_V3_assembly_report.txt	ftp://mirbase.org/pub/mirbase/22.1/genomes/ppt.gff3
ppy	22.1	GCF_000001545.4	ftp://ftp.ncbi.nlm.nih.gov/genomes/all/GCF/000/001/545/GCF_000001545.4_P_pygmaeus_2.0.2/GCF_000001545.4_P_pygmaeus_2.0.2_genomic.fna.gz	ftp://ftp.ncbi.nlm.nih.gov/genomes/all/GCF/000/001/545/GCF_000001545.4_P_pygmaeus_2.0.2/GCF_000001545.4_P_pygmaeus_2.0.2_assembly_report.txt	ftp://mirbase.org/pub/mirbase/22.1/genomes/ppy.gff3
prd	22.1	GCA_000341325.1	ftp://ftp.ncbi.nlm.nih.gov/genomes/all/GCA/000/341/325/GCA_000341325.1_Pred3/GCA_000341325.1_Pred3_genomic.fna.gz	ftp://ftp.ncbi.nlm.nih.gov/genomes/all/GCA/000/341/325/GCA_000341325.1_Pred3/GCA_000341325.1_Pred3_assembly_report.txt	ftp://mirbase.org/pub/mirbase/22.1/genomes/prd.gff3
prv	22.1	GCF_000843825.1	ftp://ftp.ncbi.nlm.nih.gov/genomes/all/GCF/000/843/825/GCF_000843825.1_ViralProj14424/GCF_000843825.1_ViralProj14424_genomic.fna.gz	ftp://ftp.ncbi.nlm.nih.gov/genomes/all/GCF/000/843/825/GCF_000843825.1_ViralProj14424/GCF_000843825.1_ViralProj14424_assembly_report.txt	ftp://mirbase.org/pub/mirbase/22.1/genomes/prv.gff3
ptc	22.1	GCA_000002775.2	ftp://ftp.ncbi.nlm.nih.gov/genomes/all/GCA/000/002/775/GCA_000002775.2_Poptr2_0/GCA_000002775.2_Poptr2_0_genomic.fna.gz	ftp://ftp.ncbi.nlm.nih.gov/genomes/all/GCA/000/002/775/GCA_000002775.2_Poptr2_0/GCA_000002775.2_Poptr2_0_assembly_report.txt	ftp://mirbase.org/pub/mirbase/22.1/genomes/ptc.gff3
pte	22.1	GCA_000365465.2	ftp://ftp.ncbi.nlm.nih.gov/genomes/all/GCA/000/365/465/GCA_000365465.2_Ptep_2.0/GCA_000365465.2_Ptep_2.0_genomic.fna.gz	ftp://ftp.ncbi.nlm.nih.gov/genomes/all/GCA/000/365/465/GCA_000365465.2_Ptep_2.0/GCA_000365465.2_Ptep_2.0_assembly_report.txt	ftp://mirbase.org/pub/mirbase/22.1/genomes/pte.gff3
pti	22.1	GCA_000150955.2	ftp://ftp.ncbi.nlm.nih.gov/genomes/all/GCA/000/150/955/GCA_000150955.2_ASM15095v2/GCA_000150955.2_ASM15095v2_genomic.fna.gz	ftp://ftp.ncbi.nlm.nih.gov/genomes/all/GCA/000/150/955/GCA_000150955.2_ASM15095v2/GCA_000150955.2_ASM15095v2_assembly_report.txt	ftp://mirbase.org/pub/mirbase/22.1/genomes/pti.gff3
ptr	22.1	GCA_000001515.5	ftp://ftp.ncbi.nlm.nih.gov/genomes/all/GCA/000/001/515/GCA_000001515.5_Pan_tro_3.0/GCA_000001515.5_Pan_tro_3.0_genomic.fna.gz	ftp://ftp.ncbi.nlm.nih.gov/genomes/all/GCA/000/001/515/GCA_000001515.5_Pan_tro_3.0/GCA_000001515.5_Pan_tro_3.0_assembly_report.txt	ftp://mirbase.org/pub/mirbase/22.1/genomes/ptr.gff3
pvu	22.1	GCA_000499845.1	ftp://ftp.ncbi.nlm.nih.gov/genomes/all/GCA/000/499/845/GCA_000499845.1_PhaVulg1_0/GCA_000499845.1_PhaVulg1_0_genomic.fna.gz	ftp://ftp.ncbi.nlm.nih.gov/genomes/all/GCA/000/499/845/GCA_000499845.1_PhaVulg1_0/GCA_000499845.1_PhaVulg1_0_assembly_report.txt	ftp://mirbase.org/pub/mirbase/22.1/genomes/pvu.gff3
pxy	22.1	v1.0	http://iae.fafu.edu.cn/DBM/data/DBM-DB.v1.0/Scaffold/P.xylostella.scaffolds.v1.fasta.tar.gz		ftp://mirbase.org/pub/mirbase/22.1/genomes/pxy.gff3
rco	22.1	GCA_000151685.2	ftp://ftp.ncbi.nlm.nih.gov/genomes/all/GCA/000/151/685/GCA_000151685.2_JCVI_RCG_1.1/GCA_000151685.2_JCVI_RCG_1.1_genomic.fna.gz	ftp://ftp.ncbi.nlm.nih.gov/genomes/all/GCA/000/151/685/GCA_000151685.2_JCVI_RCG_1.1/GCA_000151685.2_JCVI_RCG_1.1_assembly_report.txt	ftp://mirbase.org/pub/mirbase/22.1/genomes/rco.gff3
rno	22.1	GCA_000001895.4	ftp://ftp.ncbi.nlm.nih.gov/genomes/all/GCA/000/001/895/GCA_000001895.4_Rnor_6.0/GCA_000001895.4_Rnor_6.0_genomic.fna.gz	ftp://ftp.ncbi.nlm.nih.gov/genomes/all/GCA/000/001/895/GCA_000001895.4_Rnor_6.0/GCA_000001895.4_Rnor_6.0_assembly_report.txt	ftp://mirbase.org/pub/mirbase/22.1/genomes/rno.gff3
rrv	22.1	AF210726.1	https://www.ncbi.nlm.nih.gov/sviewer/viewer.cgi?tool=portal&save=file&log$=seqview&db=nuccore&report=fasta&id=7329990&extrafeat=null&conwithfeat=on		ftp://mirbase.org/pub/mirbase/22.1/genomes/rrv.gff3
sbi	22.1	GCA_000003195.3	ftp://ftp.ncbi.nlm.nih.gov/genomes/all/GCA/000/003/195/GCA_000003195.3_Sorghum_bicolor_NCBIv3/GCA_000003195.3_Sorghum_bicolor_NCBIv3_genomic.fna.gz	ftp://ftp.ncbi.nlm.nih.gov/genomes/all/GCA/000/003/195/GCA_000003195.3_Sorghum_bicolor_NCBIv3/GCA_000003195.3_Sorghum_bicolor_NCBIv3_assembly_report.txt	ftp://mirbase.org/pub/mirbase/22.1/genomes/sbi.gff3
sbo	22.1	GCA_000235385.1	ftp://ftp.ncbi.nlm.nih.gov/genomes/all/GCA/000/235/385/GCA_000235385.1_SaiBol1.0/GCA_000235385.1_SaiBol1.0_genomic.fna.gz	ftp://ftp.ncbi.nlm.nih.gov/genomes/all/GCA/000/235/385/GCA_000235385.1_SaiBol1.0/GCA_000235385.1_SaiBol1.0_assembly_report.txt	ftp://mirbase.org/pub/mirbase/22.1/genomes/sbo.gff3
sfr	22.1	GCA_000753635.2	ftp://ftp.ncbi.nlm.nih.gov/genomes/all/GCA/000/753/635/GCA_000753635.2_ASM75363v2/GCA_000753635.2_ASM75363v2_genomic.fna.gz	ftp://ftp.ncbi.nlm.nih.gov/genomes/all/GCA/000/753/635/GCA_000753635.2_ASM75363v2/GCA_000753635.2_ASM75363v2_assembly_report.txt	ftp://mirbase.org/pub/mirbase/22.1/genomes/sfr.gff3
sha	22.1	GCA_000189315	ftp://ftp.ncbi.nlm.nih.gov/genomes/all/GCA/000/189/315/GCA_000189315.1_Devil_ref_v7.0/GCA_000189315.1_Devil_ref_v7.0_genomic.fna.gz	ftp://ftp.ncbi.nlm.nih.gov/genomes/all/GCA/000/189/315/GCA_000189315.1_Devil_ref_v7.0/GCA_000189315.1_Devil_ref_v7.0_assembly_report.txt	ftp://mirbase.org/pub/mirbase/22.1/genomes/sha.gff3
sko	22.1	GCA_000003605.1	ftp://ftp.ncbi.nlm.nih.gov/genomes/all/GCA/000/003/605/GCA_000003605.1_Skow_1.1/GCA_000003605.1_Skow_1.1_genomic.fna.gz	ftp://ftp.ncbi.nlm.nih.gov/genomes/all/GCA/000/003/605/GCA_000003605.1_Skow_1.1/GCA_000003605.1_Skow_1.1_assembly_report.txt	ftp://mirbase.org/pub/mirbase/22.1/genomes/sko.gff3
sly	22.1	GCA_000188115.2	ftp://ftp.ncbi.nlm.nih.gov/genomes/all/GCA/000/188/115/GCA_000188115.2_SL2.50/GCA_000188115.2_SL2.50_genomic.fna.gz	ftp://ftp.ncbi.nlm.nih.gov/genomes/all/GCA/000/188/115/GCA_000188115.2_SL2.50/GCA_000188115.2_SL2.50_assembly_report.txt	ftp://mirbase.org/pub/mirbase/22.1/genomes/sly.gff3
sma	22.1	WTSI5	ftp://ftp.sanger.ac.uk/pub/project/pathogens/Schistosoma/mansoni/Archive/S.mansoni/genome/Assembly-v5/sma_v5.0.chr.fa.gz		ftp://mirbase.org/pub/mirbase/22.1/genomes/sma.gff3
smc	22.1	GCA_001939145.1	ftp://ftp.ncbi.nlm.nih.gov/genomes/all/GCA/001/939/145/GCA_001939145.1_ASM193914v1/GCA_001939145.1_ASM193914v1_genomic.fna.gz	ftp://ftp.ncbi.nlm.nih.gov/genomes/all/GCA/001/939/145/GCA_001939145.1_ASM193914v1/GCA_001939145.1_ASM193914v1_assembly_report.txt	ftp://mirbase.org/pub/mirbase/22.1/genomes/smc.gff3
spu	22.1	GCA_000002235.3	ftp://ftp.ncbi.nlm.nih.gov/genomes/all/GCA/000/002/235/GCA_000002235.3_Spur_4.2/GCA_000002235.3_Spur_4.2_genomic.fna.gz	ftp://ftp.ncbi.nlm.nih.gov/genomes/all/GCA/000/002/235/GCA_000002235.3_Spur_4.2/GCA_000002235.3_Spur_4.2_assembly_report.txt	ftp://mirbase.org/pub/mirbase/22.1/genomes/spu.gff3
ssc	22.1	GCA_000003025.4	ftp://ftp.ncbi.nlm.nih.gov/genomes/all/GCA/000/003/025/GCA_000003025.4_Sscrofa10.2/GCA_000003025.4_Sscrofa10.2_genomic.fna.gz	ftp://ftp.ncbi.nlm.nih.gov/genomes/all/GCA/000/003/025/GCA_000003025.4_Sscrofa10.2/GCA_000003025.4_Sscrofa10.2_assembly_report.txt	ftp://mirbase.org/pub/mirbase/22.1/genomes/ssc.gff3
str	22.1	WTSIv4	ftp://ftp.sanger.ac.uk/pub/project/pathogens/Strongyloides/ratti/version_4/Sratti_v4.genome.fa		ftp://mirbase.org/pub/mirbase/22.1/genomes/str.gff3
stu	22.1	GCA_000226075.1	ftp://ftp.ncbi.nlm.nih.gov/genomes/all/GCA/000/226/075/GCA_000226075.1_SolTub_3.0/GCA_000226075.1_SolTub_3.0_genomic.fna.gz	ftp://ftp.ncbi.nlm.nih.gov/genomes/all/GCA/000/226/075/GCA_000226075.1_SolTub_3.0/GCA_000226075.1_SolTub_3.0_assembly_report.txt	ftp://mirbase.org/pub/mirbase/22.1/genomes/stu.gff3
tca	22.1	Tcas4.0	ftp://ftp.bioinformatics.ksu.edu/pub/BeetleBase/4.0_draft/tcas.superscaffolds.fasta		ftp://mirbase.org/pub/mirbase/22.1/genomes/tca.gff3
tch	22.1	GCA_000334495.1	ftp://ftp.ncbi.nlm.nih.gov/genomes/all/GCA/000/334/495/GCA_000334495.1_TupChi_1.0/GCA_000334495.1_TupChi_1.0_genomic.fna.gz	ftp://ftp.ncbi.nlm.nih.gov/genomes/all/GCA/000/334/495/GCA_000334495.1_TupChi_1.0/GCA_000334495.1_TupChi_1.0_assembly_report.txt	ftp://mirbase.org/pub/mirbase/22.1/genomes/tch.gff3
tgu	22.1	taeGlu3.2.4	http://hgdownload.soe.ucsc.edu/goldenPath/taeGut1/bigZips/taeGut1.2bit		ftp://mirbase.org/pub/mirbase/22.1/genomes/tgu.gff3
tni	22.1	Tetraodon8	ftp://ftp.ensembl.org/pub/release-95/fasta/tetraodon_nigroviridis/dna/Tetraodon_nigroviridis.TETRAODON8.dna.toplevel.fa.gz		ftp://mirbase.org/pub/mirbase/22.1/genomes/tni.gff3
vvi	22.1	GCA_000003745.2	ftp://ftp.ncbi.nlm.nih.gov/genomes/all/GCA/000/003/745/GCA_000003745.2_12X/GCA_000003745.2_12X_genomic.fna.gz	ftp://ftp.ncbi.nlm.nih.gov/genomes/all/GCA/000/003/745/GCA_000003745.2_12X/GCA_000003745.2_12X_assembly_report.txt	ftp://mirbase.org/pub/mirbase/22.1/genomes/vvi.gff3
xla	22.1	JGIv8.0	ftp://ftp.xenbase.org/pub/Genomics/JGI/Xenla8.0/Xlaevis8_0_masked_scaffolds.fa.gz		ftp://mirbase.org/pub/mirbase/22.1/genomes/xla.gff3
xtr	22.1	GCA_000004195.3	ftp://ftp.ncbi.nlm.nih.gov/genomes/all/GCA/000/004/195/GCA_000004195.3_Xenopus_tropicalis_v9.1/GCA_000004195.3_Xenopus_tropicalis_v9.1_genomic.fna.gz	ftp://ftp.ncbi.nlm.nih.gov/genomes/all/GCA/000/004/195/GCA_000004195.3_Xenopus_tropicalis_v9.1/GCA_000004195.3_Xenopus_tropicalis_v9.1_assembly_report.txt	ftp://mirbase.org/pub/mirbase/22.1/genomes/xtr.gff3
zma	22.1	GCA_000005005.6	ftp://ftp.ncbi.nlm.nih.gov/genomes/all/GCA/000/005/005/GCA_000005005.6_B73_RefGen_v4/GCA_000005005.6_B73_RefGen_v4_genomic.fna.gz	ftp://ftp.ncbi.nlm.nih.gov/genomes/all/GCA/000/005/005/GCA_000005005.6_B73_RefGen_v4/GCA_000005005.6_B73_RefGen_v4_assembly_report.txt	ftp://mirbase.org/pub/mirbase/22.1/genomes/zma.gff3
